# Supplementary material for: Management of Displaced Midshaft Clavicle Fractures with Figure-of-Eight Bandage: The Impact of Residual Shortening on Shoulder Function
Source: MDPI journal article supplement (doi:10.3390/jpm12050759), 2022-05-07
Supplement: s1 [file s1]

**Table S1:** Correlations between clinical outcomes and radiological features.

| <b>Variable</b>                | <b>Initial<br/>displacement</b> | <b>Residual<br/>displacement</b> | <b>Initial<br/>shortening</b> | <b>Residual<br/>shortening</b> | <b>Shortening<br/>ratio</b> |
|--------------------------------|---------------------------------|----------------------------------|-------------------------------|--------------------------------|-----------------------------|
| Constant<br>score, Total       | ns                              | ns                               | - 0.432, <0.001               | - 0.500, <0.001                | - 0.663, <0.001             |
| Pain                           | ns                              | ns                               | - 0.437, <0.001               | - 0.475, <0.001                | - 0.482, <0.001             |
| ADL                            | ns                              | ns                               | - 0.373, 0.001                | - 0.398, <0.001                | - 0.454, <0.001             |
| ROM                            | ns                              | ns                               | - 0.401, <0.001               | - 0.460, <0.001                | - 0.500, <0.001             |
| Strength                       | ns                              | ns                               | - 0.294, 0.010                | - 0.363, 0.001                 | - 0.582, <0.001             |
| qDASH score,<br>Total          | ns                              | ns                               | 0.348, 0.002                  | 0.411, < 0.001                 | 0.581, < 0.001              |
| qDASH Work                     | ns                              | ns                               | 0.363, 0.001                  | 0.440, < 0.001                 | 0.482, < 0.001              |
| qDASH Sport                    | ns                              | ns                               | 0.322, 0.005                  | 0.347, 0.001                   | 0.364, 0.001                |
| Return to<br>work<br>(months)  | 0.271, 0.019                    | ns                               | 0.323, 0.005                  | ns                             | 0.333, 0.004                |
| Return to<br>sport<br>(months) | ns                              | ns                               | ns                            | ns                             | ns                          |
| VAS<br>satisfaction            | - 0.247, 0.033                  | ns                               | ns                            | ns                             | - 0.292, 0.014              |

qDASH = Quick Disabilities of the Arm, Shoulder, and Hand; VAS = Visual Analogic Scale.

All data are expressed as R, p-value. ns = not significant

**Table S2:** Radiological predictors of clinical outcomes (MANCOVA).

| Dependent Variable | Parameter        | B       | Std. Error | t      | Sig.   | 95% Confidence Interval |             | Partial Eta Squared | Noncent. Parameter | Observed Power |
|--------------------|------------------|---------|------------|--------|--------|-------------------------|-------------|---------------------|--------------------|----------------|
|                    |                  |         |            |        |        | Lower Bound             | Upper Bound |                     |                    |                |
| CS total           | Intercept        | 99.129  | 7.412      | 13.374 | <0.001 | 84.241                  | 114.017     | 0.782               | 13.374             | 1.000          |
|                    | ID               | -0.020  | 0.017      | -1.180 | 0.244  | -0.054                  | 0.014       | 0.027               | 1.180              | 0.212          |
|                    | RD               | 0.016   | 0.025      | 0.637  | 0.527  | -0.034                  | 0.066       | 0.008               | 0.637              | 0.096          |
|                    | IS               | 0.510   | 0.265      | 1.922  | 0.060  | -0.023                  | 1.042       | 0.069               | 1.922              | 0.470          |
|                    | RS               | -1.554  | 0.335      | -4.637 | <0.001 | -2.228                  | -0.881      | 0.301               | 4.637              | 0.995          |
|                    | Shortening ratio | -0.069  | 0.047      | -1.461 | 0.150  | -0.164                  | 0.026       | 0.041               | 1.461              | 0.300          |
| Pain               | Intercept        | 10.282  | 2.068      | 4.972  | <0.001 | 6.128                   | 14.435      | 0.331               | 4.972              | 0.998          |
|                    | ID               | 0.001   | 0.005      | 0.276  | 0.784  | -0.008                  | 0.011       | 0.002               | 0.276              | 0.058          |
|                    | RD               | 0.008   | 0.007      | 1.079  | 0.286  | -0.006                  | 0.022       | 0.023               | 1.079              | 0.185          |
|                    | IS               | 0.024   | 0.074      | 0.318  | 0.751  | -0.125                  | 0.172       | 0.002               | 0.318              | 0.061          |
|                    | RS               | -0.209  | 0.094      | -2.235 | 0.030  | -0.397                  | -0.021      | 0.091               | 2.235              | 0.592          |
|                    | Shortening ratio | -0.004  | 0.013      | -0.328 | 0.745  | -0.031                  | 0.022       | 0.002               | 0.328              | 0.062          |
| ADL                | Intercept        | 17.816  | 2.081      | 8.559  | <0.001 | 13.635                  | 21.997      | 0.594               | 8.559              | 1.000          |
|                    | ID               | -0.001  | 0.005      | -0.315 | 0.754  | -0.011                  | 0.008       | 0.002               | 0.315              | 0.061          |
|                    | RD               | 0.005   | 0.007      | 0.665  | 0.509  | -0.009                  | 0.019       | 0.009               | 0.665              | 0.100          |
|                    | IS               | 0.048   | 0.074      | 0.647  | 0.521  | -0.101                  | 0.198       | 0.008               | 0.647              | 0.097          |
|                    | RS               | -0.193  | 0.094      | -2.054 | 0.045  | -0.382                  | -0.004      | 0.078               | 2.054              | 0.522          |
|                    | Shortening ratio | -0.032  | 0.013      | -2.375 | 0.021  | -0.058                  | -0.005      | 0.101               | 2.375              | 0.644          |
| ROM                | Intercept        | 45.954  | 2.442      | 18.816 | <0.001 | 41.049                  | 50.860      | 0.876               | 18.816             | 1.000          |
|                    | ID               | -0.006  | 0.006      | -1.079 | 0.286  | -0.017                  | 0.005       | 0.023               | 1.079              | 0.185          |
|                    | RD               | -0.001  | 0.008      | -0.146 | 0.885  | -0.018                  | 0.015       | 0.000               | 0.146              | 0.052          |
|                    | IS               | 0.095   | 0.087      | 1.090  | 0.281  | -0.080                  | 0.271       | 0.023               | 1.090              | 0.188          |
|                    | RS               | -0.272  | 0.110      | -2.466 | 0.017  | -0.494                  | -0.051      | 0.108               | 2.466              | 0.677          |
|                    | Shortening ratio | -0.030  | 0.016      | -1.905 | 0.063  | -0.061                  | 0.002       | 0.068               | 1.905              | 0.464          |
| Strenght           | Intercept        | 25.679  | 4.299      | 5.974  | <0.001 | 17.045                  | 34.313      | 0.416               | 5.974              | 1.000          |
|                    | ID               | -0.015  | 0.010      | -1.551 | 0.127  | -0.035                  | 0.004       | 0.046               | 1.551              | 0.331          |
|                    | RD               | 0.006   | 0.015      | 0.397  | 0.693  | -0.023                  | 0.035       | 0.003               | 0.397              | 0.068          |
|                    | IS               | 0.340   | 0.154      | 2.209  | 0.032  | 0.031                   | 0.648       | 0.089               | 2.209              | 0.582          |
|                    | RS               | -0.799  | 0.194      | -4.110 | <0.001 | -1.190                  | -0.409      | 0.253               | 4.110              | 0.981          |
|                    | Shortening ratio | -0.030  | 0.027      | -1.082 | 0.284  | -0.085                  | 0.025       | 0.023               | 1.082              | 0.186          |
| qDASH              | Intercept        | 279.396 | 579.908    | 0.482  | 0.632  | -885.383                | 1444.175    | 0.005               | 0.482              | 0.076          |
|                    | ID               | -1.143  | 1.322      | -0.864 | 0.392  | -3.799                  | 1.513       | 0.015               | 0.864              | 0.135          |
|                    | RD               | -0.031  | 1.957      | -0.016 | 0.987  | -3.962                  | 3.900       | 0.000               | 0.016              | 0.050          |
|                    | IS               | 4.796   | 20.742     | 0.231  | 0.818  | -36.864                 | 46.457      | 0.001               | 0.231              | 0.056          |
|                    | RS               | 22.984  | 26.228     | 0.876  | 0.385  | -29.697                 | 75.666      | 0.015               | 0.876              | 0.138          |
|                    | Shortening ratio | -2.211  | 3.696      | -0.598 | 0.552  | -9.634                  | 5.212       | 0.007               | 0.598              | 0.090          |

|              |                  |          |          |        |       |           |          |       |       |       |
|--------------|------------------|----------|----------|--------|-------|-----------|----------|-------|-------|-------|
| qDASH_Work   | Intercept        | -794.927 | 1353.664 | -0.587 | 0.560 | -3513.841 | 1923.987 | 0.007 | 0.587 | 0.089 |
|              | ID               | -0.592   | 3.087    | -0.192 | 0.849 | -6.792    | 5.608    | 0.001 | 0.192 | 0.054 |
|              | RD               | 1.207    | 4.569    | 0.264  | 0.793 | -7.970    | 10.383   | 0.001 | 0.264 | 0.058 |
|              | IS               | -3.290   | 48.417   | -0.068 | 0.946 | -100.537  | 93.958   | 0.000 | 0.068 | 0.051 |
|              | RS               | 38.913   | 61.224   | 0.636  | 0.528 | -84.060   | 161.886  | 0.008 | 0.636 | 0.096 |
|              | Shortening ratio | -3.790   | 8.627    | -0.439 | 0.662 | -21.118   | 13.538   | 0.004 | 0.439 | 0.072 |
| qDASH_Sport  | Intercept        | 2138.958 | 2003.231 | 1.068  | 0.291 | -1884.650 | 6162.566 | 0.022 | 1.068 | 0.182 |
|              | ID               | -4.230   | 4.568    | -0.926 | 0.359 | -13.405   | 4.946    | 0.017 | 0.926 | 0.149 |
|              | RD               | -1.437   | 6.761    | -0.213 | 0.833 | -15.017   | 12.143   | 0.001 | 0.213 | 0.055 |
|              | IS               | -8.645   | 71.650   | -0.121 | 0.904 | -152.558  | 135.267  | 0.000 | 0.121 | 0.052 |
|              | RS               | 120.019  | 90.604   | 1.325  | 0.191 | -61.964   | 302.001  | 0.034 | 1.325 | 0.255 |
|              | Shortening ratio | -7.170   | 12.767   | -0.562 | 0.577 | -32.813   | 18.473   | 0.006 | 0.562 | 0.085 |
| Work_months  | Intercept        | 1.260    | 1.849    | 0.682  | 0.499 | -2.453    | 4.974    | 0.009 | 0.682 | 0.103 |
|              | ID               | -0.003   | 0.004    | -0.610 | 0.545 | -0.011    | 0.006    | 0.007 | 0.610 | 0.092 |
|              | RD               | 0.005    | 0.006    | 0.761  | 0.450 | -0.008    | 0.017    | 0.011 | 0.761 | 0.116 |
|              | IS               | -0.096   | 0.066    | -1.453 | 0.152 | -0.229    | 0.037    | 0.041 | 1.453 | 0.297 |
|              | RS               | 0.217    | 0.084    | 2.600  | 0.012 | 0.049     | 0.385    | 0.119 | 2.600 | 0.722 |
|              | Shortening ratio | 0.010    | 0.012    | 0.853  | 0.398 | -0.014    | 0.034    | 0.014 | 0.853 | 0.133 |
| Sport_months | Intercept        | 3.044    | 3.364    | 0.905  | 0.370 | -3.714    | 9.801    | 0.016 | 0.905 | 0.144 |
|              | ID               | -0.010   | 0.008    | -1.285 | 0.205 | -0.025    | 0.006    | 0.032 | 1.285 | 0.243 |
|              | RD               | 0.004    | 0.011    | 0.391  | 0.697 | -0.018    | 0.027    | 0.003 | 0.391 | 0.067 |
|              | IS               | -0.032   | 0.120    | -0.262 | 0.794 | -0.273    | 0.210    | 0.001 | 0.262 | 0.058 |
|              | RS               | 0.144    | 0.152    | 0.947  | 0.348 | -0.161    | 0.450    | 0.018 | 0.947 | 0.153 |
|              | Shortening ratio | 0.004    | 0.021    | 0.209  | 0.836 | -0.039    | 0.048    | 0.001 | 0.209 | 0.055 |

---

CS=Constant Score; ID=Initial Displacement; RD=Residual Displacement; IS=Initial Shortening; RS=Residual Shortening;  
qDASH = Quick Disabilities of the Arm, Shoulder, and Hand.

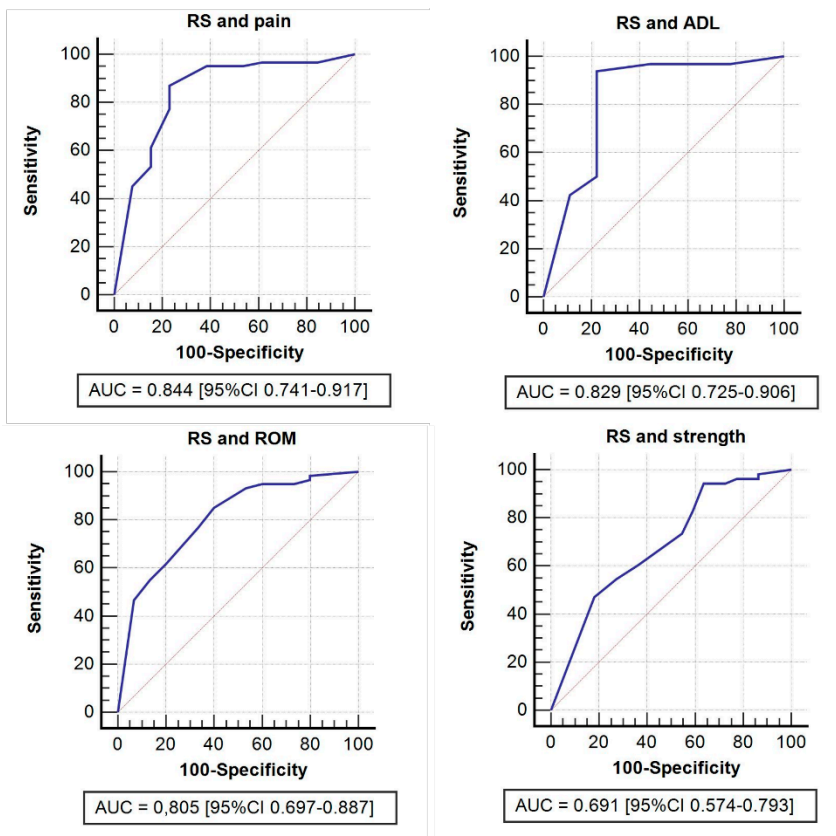

**Figure S1.** ROC curves for residual shortening and its impact CS subscales: pain, ADL, ROM, and strength.
